# Supplementary material
Source: publisher figshare collection journal article supplement (https://acs.figshare.com/ndownloader/files/4554700)
Supplement: Supplementary file 1 [file 4554700]

 
data_spitz10f_0m 
 
_audit_creation_method            SHELXL-97 
_chemical_name_systematic 
; 
 ? 
; 
_chemical_name_common             ? 
_chemical_melting_point           ? 
_chemical_formula_moiety          ? 
_chemical_formula_sum 
 'C20 H17 N O2 S2' 
_chemical_formula_weight          367.47 
 
loop_ 
 _atom_type_symbol 
 _atom_type_description 
 _atom_type_scat_dispersion_real 
 _atom_type_scat_dispersion_imag 
 _atom_type_scat_source 
 'C'  'C'   0.0033   0.0016 
 'International Tables Vol C Tables 4.2.6.8 and 6.1.1.4' 
 'H'  'H'   0.0000   0.0000 
 'International Tables Vol C Tables 4.2.6.8 and 6.1.1.4' 
 'N'  'N'   0.0061   0.0033 
 'International Tables Vol C Tables 4.2.6.8 and 6.1.1.4' 
 'O'  'O'   0.0106   0.0060 
 'International Tables Vol C Tables 4.2.6.8 and 6.1.1.4' 
 'S'  'S'   0.1246   0.1234 
 'International Tables Vol C Tables 4.2.6.8 and 6.1.1.4' 
 
_symmetry_cell_setting            ? 
_symmetry_space_group_name_H-M    ? 
 
loop_ 
 _symmetry_equiv_pos_as_xyz 
 'x, y, z' 
 '-x+1/2, -y, z+1/2' 
 '-x, y+1/2, -z+1/2' 
 'x+1/2, -y+1/2, -z' 
 
_cell_length_a                    10.8068(3) 
_cell_length_b                    11.1270(3) 
_cell_length_c                    14.8373(4) 
_cell_angle_alpha                 90.00 
_cell_angle_beta                  90.00 
_cell_angle_gamma                 90.00 
_cell_volume                      1784.14(8) 
_cell_formula_units_Z             4 
_cell_measurement_temperature     296(2) 
_cell_measurement_reflns_used     ? 
_cell_measurement_theta_min       ? 
_cell_measurement_theta_max       ? 
 
_exptl_crystal_description        ? 
_exptl_crystal_colour             ? 
_exptl_crystal_size_max           ? 
_exptl_crystal_size_mid           ? 
_exptl_crystal_size_min           ? 
_exptl_crystal_density_meas       ? 
_exptl_crystal_density_diffrn     1.368 
_exptl_crystal_density_method     'not measured' 
_exptl_crystal_F_000              768 
_exptl_absorpt_coefficient_mu     0.311 
_exptl_absorpt_correction_type    ? 
_exptl_absorpt_correction_T_min   ? 
_exptl_absorpt_correction_T_max   ? 
_exptl_absorpt_process_details    ? 
 
_exptl_special_details 
; 
 ? 
; 
 
_diffrn_ambient_temperature       296(2) 
_diffrn_radiation_wavelength      0.71073 
_diffrn_radiation_type            MoK\a 
_diffrn_radiation_source          'fine-focus sealed tube' 
_diffrn_radiation_monochromator   graphite 
_diffrn_measurement_device_type   ? 
_diffrn_measurement_method        ? 
_diffrn_detector_area_resol_mean  ? 
_diffrn_standards_number          ? 
_diffrn_standards_interval_count  ? 
_diffrn_standards_interval_time   ? 
_diffrn_standards_decay_%         ? 
_diffrn_reflns_number             62605 
_diffrn_reflns_av_R_equivalents   0.0276 
_diffrn_reflns_av_sigmaI/netI     0.0190 
_diffrn_reflns_limit_h_min        -17 
_diffrn_reflns_limit_h_max        15 
_diffrn_reflns_limit_k_min        -18 
_diffrn_reflns_limit_k_max        17 
_diffrn_reflns_limit_l_min        -24 
_diffrn_reflns_limit_l_max        23 
_diffrn_reflns_theta_min          2.63 
_diffrn_reflns_theta_max          36.24 
_reflns_number_total              8575 
_reflns_number_gt                 7920 
_reflns_threshold_expression      >2sigma(I) 
 
_computing_data_collection        ? 
_computing_cell_refinement        ? 
_computing_data_reduction         ? 
_computing_structure_solution     'SHELXS-97 (Sheldrick, 1990)' 
_computing_structure_refinement   'SHELXL-97 (Sheldrick, 1997)' 
_computing_molecular_graphics     ? 
_computing_publication_material   ? 
 
_refine_special_details 
; 
 Refinement of F^2^ against ALL reflections.  The weighted R-factor wR and 
 goodness of fit S are based on F^2^, conventional R-factors R are based 
 on F, with F set to zero for negative F^2^. The threshold expression of 
 F^2^ > 2sigma(F^2^) is used only for calculating R-factors(gt) etc. and is 
 not relevant to the choice of reflections for refinement.  R-factors based 
 on F^2^ are statistically about twice as large as those based on F, and R- 
 factors based on ALL data will be even larger. 
; 
 
_refine_ls_structure_factor_coef  Fsqd  
_refine_ls_matrix_type            full 
_refine_ls_weighting_scheme       calc  
_refine_ls_weighting_details 
 'calc w=1/[\s^2^(Fo^2^)+(0.0463P)^2^+0.1128P] where P=(Fo^2^+2Fc^2^)/3' 
_atom_sites_solution_primary      direct 
_atom_sites_solution_secondary    difmap 
_atom_sites_solution_hydrogens    geom 
_refine_ls_hydrogen_treatment     mixed 
_refine_ls_extinction_method      none 
_refine_ls_extinction_coef        ? 
_refine_ls_abs_structure_details 
 'Flack H D (1983), Acta Cryst. A39, 876-881' 
_refine_ls_abs_structure_Flack    -0.03(3) 
_refine_ls_number_reflns          8575 
_refine_ls_number_parameters      283 
_refine_ls_number_restraints      0 
_refine_ls_R_factor_all           0.0315 
_refine_ls_R_factor_gt            0.0264 
_refine_ls_wR_factor_ref          0.0743 
_refine_ls_wR_factor_gt           0.0708 
_refine_ls_goodness_of_fit_ref    1.079 
_refine_ls_restrained_S_all       1.079 
_refine_ls_shift/su_max           0.001 
_refine_ls_shift/su_mean          0.000 
 
loop_ 
 _atom_site_label 
 _atom_site_type_symbol 
 _atom_site_fract_x 
 _atom_site_fract_y 
 _atom_site_fract_z 
 _atom_site_U_iso_or_equiv 
 _atom_site_adp_type 
 _atom_site_occupancy 
 _atom_site_symmetry_multiplicity 
 _atom_site_calc_flag 
 _atom_site_refinement_flags 
 _atom_site_disorder_assembly 
 _atom_site_disorder_group 
S1 S 0.476486(18) 0.742143(18) 0.023815(12) 0.01448(4) Uani 1 1 d . . . 
S2 S 0.503869(17) 0.750760(18) 0.215072(12) 0.01507(4) Uani 1 1 d . . . 
C7 C 0.52764(7) 0.54640(7) 0.11714(5) 0.01309(12) Uani 1 1 d . . . 
C14 C 0.34254(8) 0.74576(8) 0.22555(5) 0.01663(12) Uani 1 1 d . . . 
C8 C 0.64083(7) 0.49317(7) 0.07113(5) 0.01387(12) Uani 1 1 d . . . 
C9 C 0.63597(8) 0.43662(8) -0.01226(6) 0.01687(13) Uani 1 1 d . . . 
C6 C 0.26176(8) 0.62041(8) -0.03453(5) 0.01645(13) Uani 1 1 d . . . 
C1 C 0.36963(7) 0.62283(7) 0.01644(5) 0.01337(12) Uani 1 1 d . . . 
C2 C 0.40622(7) 0.52529(7) 0.06939(5) 0.01317(12) Uani 1 1 d . . . 
C4 C 0.22341(8) 0.41999(8) 0.02280(7) 0.01909(14) Uani 1 1 d . . . 
C3 C 0.33292(8) 0.42308(7) 0.07268(6) 0.01706(14) Uani 1 1 d . . . 
C5 C 0.18863(8) 0.51735(8) -0.03027(6) 0.01831(14) Uani 1 1 d . . . 
C13 C 0.75469(8) 0.50522(9) 0.11429(6) 0.02060(15) Uani 1 1 d . . . 
C10 C 0.74443(8) 0.39364(8) -0.05232(6) 0.01896(15) Uani 1 1 d . . . 
C17 C 0.08650(9) 0.73463(11) 0.23925(7) 0.02538(18) Uani 1 1 d . . . 
C11 C 0.85724(9) 0.40611(8) -0.00894(7) 0.02019(15) Uani 1 1 d . . . 
C19 C 0.27136(9) 0.83624(8) 0.18684(6) 0.02071(16) Uani 1 1 d . . . 
C20 C -0.05201(10) 0.73137(15) 0.24853(10) 0.0393(3) Uani 1 1 d . . . 
H20A H -0.0784 0.6501 0.2588 0.059 Uiso 1 1 calc R . . 
H20B H -0.0894 0.7612 0.1942 0.059 Uiso 1 1 calc R . . 
H20C H -0.0767 0.7807 0.2985 0.059 Uiso 1 1 calc R . . 
C18 C 0.14379(10) 0.82939(10) 0.19363(7) 0.02404(17) Uani 1 1 d . . . 
C12 C 0.86243(9) 0.46192(10) 0.07492(7) 0.02405(17) Uani 1 1 d . . . 
C15 C 0.28806(10) 0.64915(9) 0.26962(7) 0.02408(17) Uani 1 1 d . . . 
C16 C 0.15975(10) 0.64520(11) 0.27641(8) 0.0295(2) Uani 1 1 d . . . 
N1 N 0.54367(7) 0.68073(6) 0.11945(4) 0.01362(11) Uani 1 1 d . . . 
O1 O 0.54007(7) 0.87383(6) 0.20249(5) 0.02145(12) Uani 1 1 d . . . 
O2 O 0.55972(7) 0.68116(7) 0.28580(4) 0.02178(13) Uani 1 1 d . . . 
H5 H 0.5238(12) 0.5227(12) 0.1776(9) 0.015(3) Uiso 1 1 d . . . 
H1 H 0.2398(12) 0.6846(12) -0.0731(9) 0.017(3) Uiso 1 1 d . . . 
H11 H 0.3068(15) 0.9002(14) 0.1585(10) 0.028(4) Uiso 1 1 d . . . 
H4 H 0.3535(14) 0.3600(14) 0.1104(10) 0.027(4) Uiso 1 1 d . . . 
H2 H 0.1187(13) 0.5159(13) -0.0664(10) 0.022(3) Uiso 1 1 d . . . 
H13 H 0.1199(18) 0.5776(18) 0.3073(13) 0.050(5) Uiso 1 1 d . . . 
H3 H 0.1717(14) 0.3487(14) 0.0203(10) 0.028(4) Uiso 1 1 d . . . 
H12 H 0.0940(17) 0.8880(17) 0.1683(11) 0.041(5) Uiso 1 1 d . . . 
H8 H 0.9287(14) 0.3824(14) -0.0364(10) 0.028(4) Uiso 1 1 d . . . 
H14 H 0.3416(16) 0.5931(15) 0.2967(11) 0.034(4) Uiso 1 1 d . . . 
H7 H 0.7384(14) 0.3577(15) -0.1112(10) 0.032(4) Uiso 1 1 d . . . 
H10 H 0.7576(15) 0.5445(15) 0.1693(11) 0.031(4) Uiso 1 1 d . . . 
H9 H 0.9436(15) 0.4701(14) 0.1062(10) 0.030(4) Uiso 1 1 d . . . 
H6 H 0.5506(14) 0.4260(14) -0.0431(10) 0.028(4) Uiso 1 1 d . . . 
 
loop_ 
 _atom_site_aniso_label 
 _atom_site_aniso_U_11 
 _atom_site_aniso_U_22 
 _atom_site_aniso_U_33 
 _atom_site_aniso_U_23 
 _atom_site_aniso_U_13 
 _atom_site_aniso_U_12 
S1 0.01831(8) 0.01225(7) 0.01288(7) 0.00210(6) 0.00020(5) -0.00163(6) 
S2 0.01857(8) 0.01454(8) 0.01211(7) -0.00196(6) -0.00014(5) -0.00189(7) 
C7 0.0147(3) 0.0113(3) 0.0132(3) 0.0011(2) -0.0013(2) -0.0010(2) 
C14 0.0201(3) 0.0167(3) 0.0130(3) -0.0003(3) 0.0031(2) -0.0002(3) 
C8 0.0141(3) 0.0126(3) 0.0150(3) 0.0012(2) -0.0015(2) 0.0002(2) 
C9 0.0166(3) 0.0159(3) 0.0181(3) -0.0021(3) -0.0019(3) 0.0011(3) 
C6 0.0156(3) 0.0165(3) 0.0173(3) 0.0014(3) -0.0013(3) 0.0024(2) 
C1 0.0144(3) 0.0125(3) 0.0133(3) 0.0008(2) 0.0004(2) 0.0007(2) 
C2 0.0140(3) 0.0117(3) 0.0138(3) 0.0006(2) -0.0008(2) 0.0002(2) 
C4 0.0163(3) 0.0158(3) 0.0252(4) 0.0003(3) -0.0039(3) -0.0021(3) 
C3 0.0164(3) 0.0129(3) 0.0219(4) 0.0019(3) -0.0031(3) -0.0015(2) 
C5 0.0146(3) 0.0186(3) 0.0218(4) -0.0010(3) -0.0034(3) 0.0011(3) 
C13 0.0160(3) 0.0266(4) 0.0192(3) -0.0038(3) -0.0035(3) 0.0011(3) 
C10 0.0187(4) 0.0178(4) 0.0204(4) -0.0034(3) 0.0009(3) 0.0012(3) 
C17 0.0204(4) 0.0345(5) 0.0213(4) -0.0021(4) 0.0032(3) -0.0038(4) 
C11 0.0161(3) 0.0196(4) 0.0248(4) -0.0001(3) 0.0016(3) 0.0015(3) 
C19 0.0228(4) 0.0192(4) 0.0201(4) 0.0023(3) 0.0041(3) 0.0023(3) 
C20 0.0210(4) 0.0565(8) 0.0404(6) 0.0012(6) 0.0035(4) -0.0053(5) 
C18 0.0227(4) 0.0279(5) 0.0215(4) 0.0015(3) 0.0017(3) 0.0036(3) 
C12 0.0149(3) 0.0313(5) 0.0259(4) -0.0031(4) -0.0035(3) 0.0019(3) 
C15 0.0249(4) 0.0236(4) 0.0237(4) 0.0076(3) 0.0054(3) -0.0012(3) 
C16 0.0255(4) 0.0309(5) 0.0320(5) 0.0081(4) 0.0075(4) -0.0054(4) 
N1 0.0171(3) 0.0119(2) 0.0118(2) 0.0001(2) 0.0000(2) -0.0012(2) 
O1 0.0271(3) 0.0150(3) 0.0222(3) -0.0050(2) 0.0032(2) -0.0055(2) 
O2 0.0264(3) 0.0257(3) 0.0132(2) -0.0002(2) -0.0050(2) 0.0007(2) 
 
_geom_special_details 
; 
 All esds (except the esd in the dihedral angle between two l.s. planes) 
 are estimated using the full covariance matrix.  The cell esds are taken 
 into account individually in the estimation of esds in distances, angles 
 and torsion angles; correlations between esds in cell parameters are only 
 used when they are defined by crystal symmetry.  An approximate (isotropic) 
 treatment of cell esds is used for estimating esds involving l.s. planes. 
; 
 
loop_ 
 _geom_bond_atom_site_label_1 
 _geom_bond_atom_site_label_2 
 _geom_bond_distance 
 _geom_bond_site_symmetry_2 
 _geom_bond_publ_flag 
S1 N1 1.7342(7) . ? 
S1 C1 1.7630(8) . ? 
S2 O1 1.4364(7) . ? 
S2 O2 1.4371(7) . ? 
S2 N1 1.6749(7) . ? 
S2 C14 1.7513(8) . ? 
C7 N1 1.5051(10) . ? 
C7 C2 1.5096(11) . ? 
C7 C8 1.5209(11) . ? 
C7 H5 0.936(13) . ? 
C14 C15 1.3892(12) . ? 
C14 C19 1.3911(13) . ? 
C8 C9 1.3891(12) . ? 
C8 C13 1.3936(12) . ? 
C9 C10 1.3985(12) . ? 
C9 H6 1.037(15) . ? 
C6 C1 1.3897(11) . ? 
C6 C5 1.3942(12) . ? 
C6 H1 0.946(14) . ? 
C1 C2 1.3969(11) . ? 
C2 C3 1.3869(11) . ? 
C4 C5 1.3910(13) . ? 
C4 C3 1.3962(12) . ? 
C4 H3 0.971(15) . ? 
C3 H4 0.925(15) . ? 
C5 H2 0.927(14) . ? 
C13 C12 1.3889(13) . ? 
C13 H10 0.927(16) . ? 
C10 C11 1.3855(13) . ? 
C10 H7 0.963(16) . ? 
C17 C16 1.3859(16) . ? 
C17 C18 1.3977(15) . ? 
C17 C20 1.5036(15) . ? 
C11 C12 1.3918(14) . ? 
C11 H8 0.913(15) . ? 
C19 C18 1.3844(14) . ? 
C19 H11 0.911(15) . ? 
C20 H20A 0.9600 . ? 
C20 H20B 0.9600 . ? 
C20 H20C 0.9600 . ? 
C18 H12 0.925(19) . ? 
C12 H9 0.997(16) . ? 
C15 C16 1.3910(15) . ? 
C15 H14 0.941(17) . ? 
C16 H13 0.98(2) . ? 
 
loop_ 
 _geom_angle_atom_site_label_1 
 _geom_angle_atom_site_label_2 
 _geom_angle_atom_site_label_3 
 _geom_angle 
 _geom_angle_site_symmetry_1 
 _geom_angle_site_symmetry_3 
 _geom_angle_publ_flag 
N1 S1 C1 91.62(3) . . ? 
O1 S2 O2 119.62(4) . . ? 
O1 S2 N1 105.28(4) . . ? 
O2 S2 N1 105.07(4) . . ? 
O1 S2 C14 108.23(4) . . ? 
O2 S2 C14 109.65(4) . . ? 
N1 S2 C14 108.43(4) . . ? 
N1 C7 C2 105.38(6) . . ? 
N1 C7 C8 107.72(6) . . ? 
C2 C7 C8 115.33(6) . . ? 
N1 C7 H5 105.3(8) . . ? 
C2 C7 H5 111.5(8) . . ? 
C8 C7 H5 110.9(8) . . ? 
C15 C14 C19 121.33(8) . . ? 
C15 C14 S2 119.22(7) . . ? 
C19 C14 S2 119.40(7) . . ? 
C9 C8 C13 119.09(8) . . ? 
C9 C8 C7 123.08(7) . . ? 
C13 C8 C7 117.80(7) . . ? 
C8 C9 C10 120.12(8) . . ? 
C8 C9 H6 118.6(8) . . ? 
C10 C9 H6 121.3(8) . . ? 
C1 C6 C5 117.82(7) . . ? 
C1 C6 H1 121.7(8) . . ? 
C5 C6 H1 120.4(8) . . ? 
C6 C1 C2 121.90(7) . . ? 
C6 C1 S1 126.71(6) . . ? 
C2 C1 S1 111.39(6) . . ? 
C3 C2 C1 119.69(7) . . ? 
C3 C2 C7 127.41(7) . . ? 
C1 C2 C7 112.90(7) . . ? 
C5 C4 C3 120.66(8) . . ? 
C5 C4 H3 117.3(9) . . ? 
C3 C4 H3 121.9(9) . . ? 
C2 C3 C4 119.05(8) . . ? 
C2 C3 H4 120.4(9) . . ? 
C4 C3 H4 120.4(9) . . ? 
C4 C5 C6 120.87(8) . . ? 
C4 C5 H2 122.3(9) . . ? 
C6 C5 H2 116.8(9) . . ? 
C12 C13 C8 120.90(8) . . ? 
C12 C13 H10 120.4(10) . . ? 
C8 C13 H10 118.7(10) . . ? 
C11 C10 C9 120.38(8) . . ? 
C11 C10 H7 121.5(9) . . ? 
C9 C10 H7 118.1(9) . . ? 
C16 C17 C18 118.77(9) . . ? 
C16 C17 C20 120.99(11) . . ? 
C18 C17 C20 120.24(11) . . ? 
C10 C11 C12 119.70(9) . . ? 
C10 C11 H8 120.6(10) . . ? 
C12 C11 H8 119.6(10) . . ? 
C18 C19 C14 118.74(9) . . ? 
C18 C19 H11 119.7(10) . . ? 
C14 C19 H11 121.6(10) . . ? 
C17 C20 H20A 109.5 . . ? 
C17 C20 H20B 109.5 . . ? 
H20A C20 H20B 109.5 . . ? 
C17 C20 H20C 109.5 . . ? 
H20A C20 H20C 109.5 . . ? 
H20B C20 H20C 109.5 . . ? 
C19 C18 C17 121.19(10) . . ? 
C19 C18 H12 120.7(11) . . ? 
C17 C18 H12 118.1(11) . . ? 
C13 C12 C11 119.81(8) . . ? 
C13 C12 H9 120.7(9) . . ? 
C11 C12 H9 119.5(9) . . ? 
C14 C15 C16 118.75(9) . . ? 
C14 C15 H14 117.0(10) . . ? 
C16 C15 H14 124.1(10) . . ? 
C17 C16 C15 121.19(10) . . ? 
C17 C16 H13 119.1(12) . . ? 
C15 C16 H13 119.7(11) . . ? 
C7 N1 S2 116.85(5) . . ? 
C7 N1 S1 108.94(5) . . ? 
S2 N1 S1 113.72(4) . . ? 
 
_diffrn_measured_fraction_theta_max    0.998 
_diffrn_reflns_theta_full              36.24 
_diffrn_measured_fraction_theta_full   0.998 
_refine_diff_density_max    0.435 
_refine_diff_density_min   -0.206 
_refine_diff_density_rms    0.054 
